# Supplementary material for: Kinetic analysis of the RNA cleavage of the conformationally-constrained oxetane-modified antisense-RNA hybrid duplex by RNase HElectronic supplementary information (ESI) available: autoradiograms of denaturing PAGE gels. See http://www.rsc.org/suppdata/p2/b1/b111438g/
Source: Royal Society of Chemistry journal article supplement (doi:10.1039/b111438g), 2002-03-20
Supplement: b111438g.doc [file b111438g.doc]

**Supplementary data**

**(A) (B)**  **(C)** (**D**) **(E)**

1 8 7 6 5 4 3 2 8 7 6 5 4 3 2 1 8 7 6 5 4 3 2 1 9 8 7 6 5 4 3 2 1 9 8 7 6 5 4 3 2 1


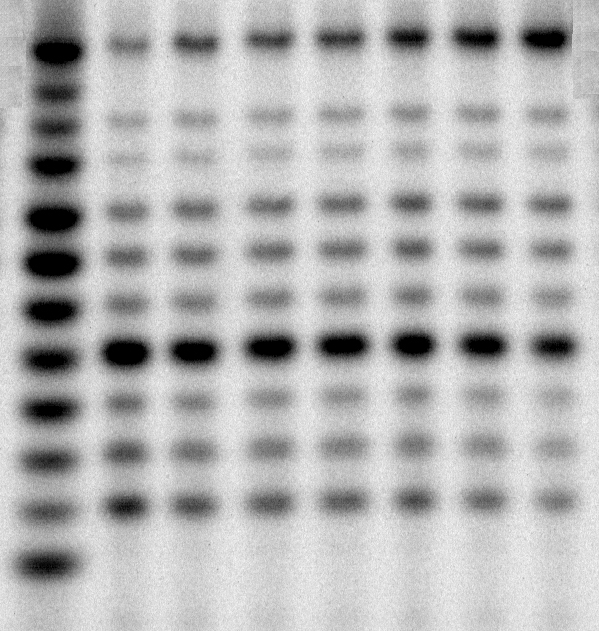

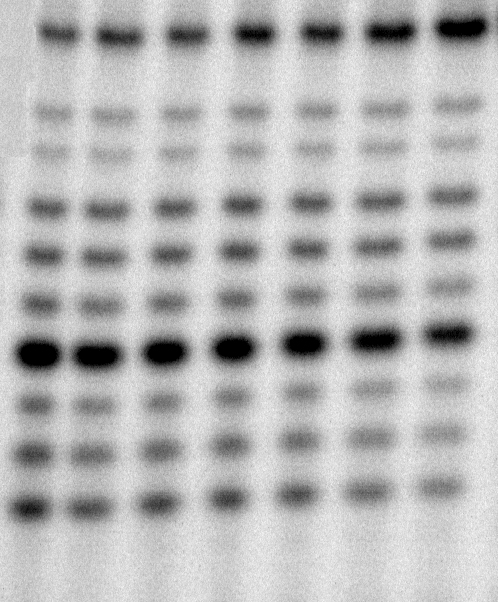

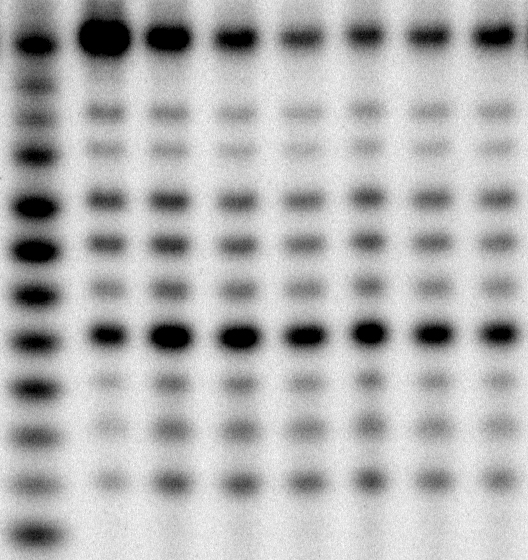

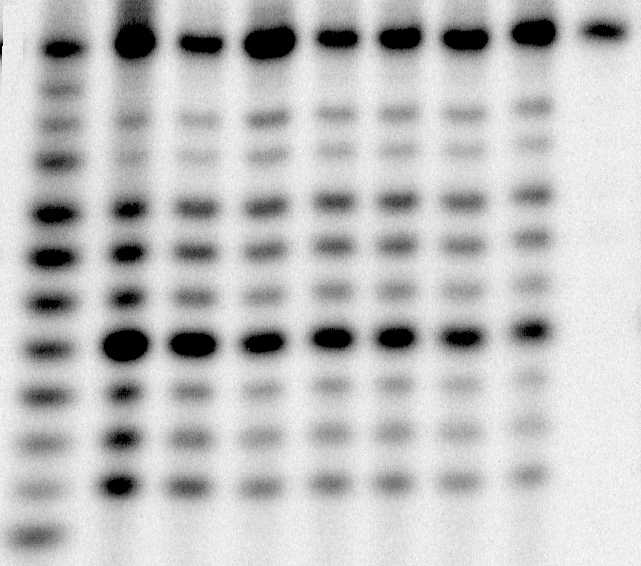

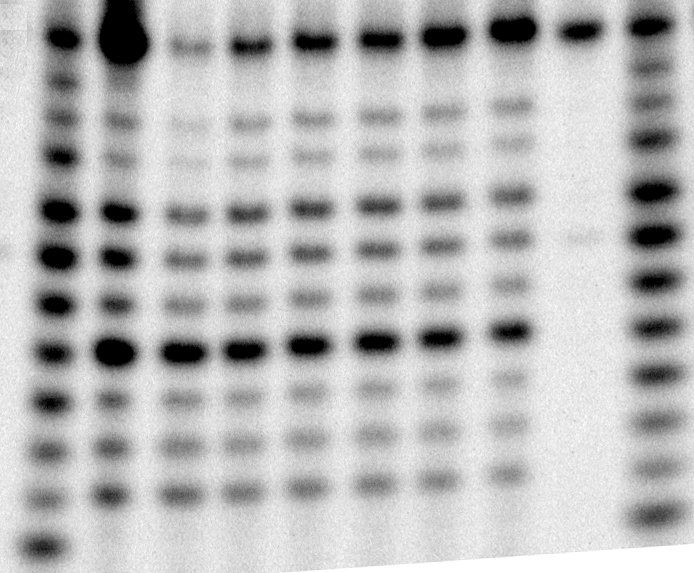


A13→

A8→

A5→

←A8

←A13

←A5

**(F) (G)**  **(H)** (**I**) **(J)**

7 6 5 4 3 2 1 8 7 6 5 4 3 2 1 1 8 7 6 5 4 3 2 1 9 8 7 6 5 4 3 2 2 1 9 8 7 6 5 4 3 2


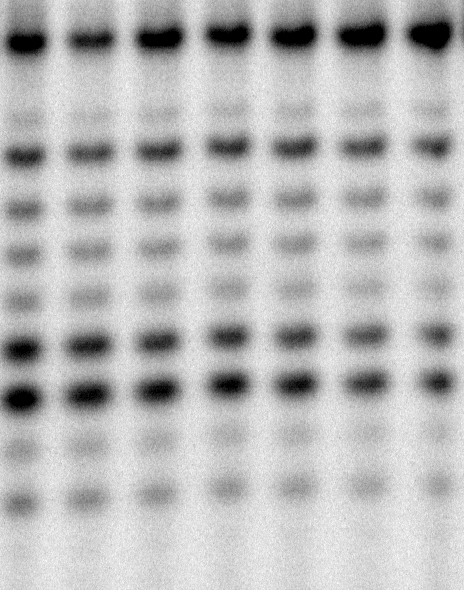

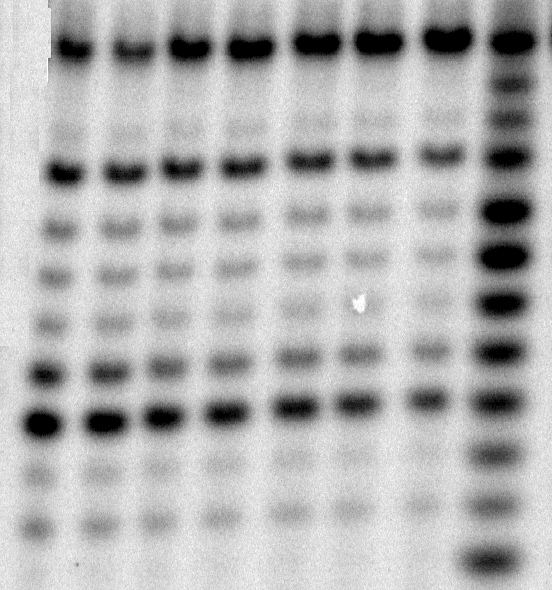

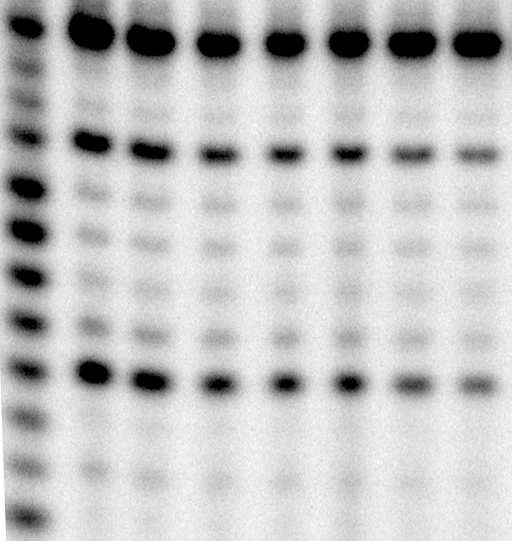

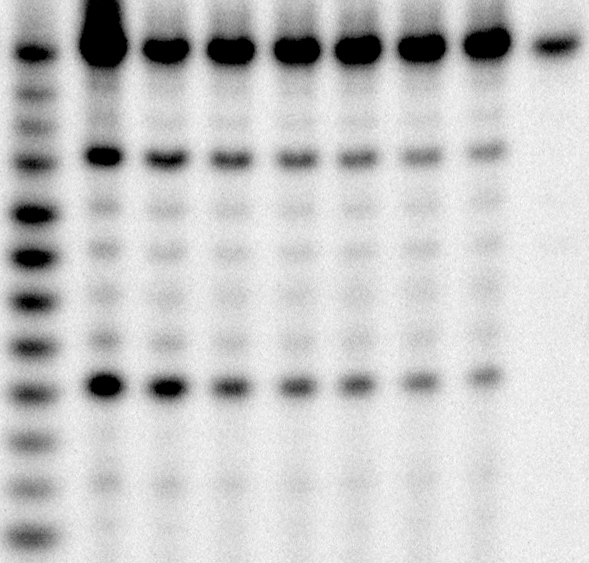

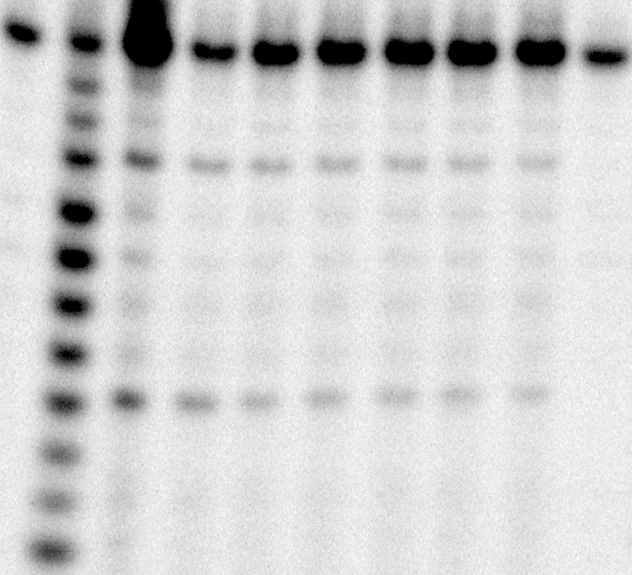


G12→

A8→

A7→

←A7

←G12

**Figure 1S.** Autoradiograms of the 20% denaturing PAGE, showing kinetics of the complementary 5’-32P-labelled target RNA (**3**) cleavage by RNase H as a function of the AON concentration in the native 15mer AON (**1**) /RNA (**3**) [gels: **A**-**E**] and Oxetane-AON (**2**) /RNA (**3**) [gels: **F**-**J**] hybrid duplexes. (**A**) with 1 μM AON (**1**), lane 1: snake venom PDE ladder. Lanes 2-8: aliquots of the digest taken after 2,4,6,7,8,10 and 90 min, respectively. (**B**) with 0.5 μM AON (**1**), Lanes 2-8: aliquots of the digest taken after 2,4,6,7,8,10 and 90 min, respectively. (**C**) with 0. 1 μM AON (**1**), lane 1: snake venom PDE ladder. Lanes 2-8: aliquots of the digest taken after 2,4,6,7,8,10 and 90 min, respectively. (**D**) with 0.05 μM AON (**1**), lanes 1: snake venom PDE ladder. Lane 2: 5’-32P-labelled target RNA (**3**) without AON, Lanes 3-9: aliquots of the digest taken after 2,3,4,5,6,20 and 90 min, respectively.(**E**) with 0.01 μM AON (**1**), lane 1: snake venom PDE ladder. Lane 2: 5’-32P-labelled target RNA (**3**) without AON, Lanes 3-9: aliquots of the digest taken after 2, 3,4,5,6,20 and 90 min, respectively. (**F**) with 1 μM AON (**2**), lanes 1-7: aliquots of the digest taken after 2,4,6,7,8,10 and 90 min, respectively. (**G**) with 0.5 μM AON (**2**), lane 1: snake venom PDE ladder. Lanes 2-8: aliquots of the digest taken after 2,4,6,7,8,10 and 90 min, respectively. (**H**) with 0.01 μM AON (**1**), lane 1: snake venom PDE ladder. Lanes 2-8: aliquots of the digest taken after 2, 4,6,7,8,10 and 90 min, respectively. (**I**) with 0.05 μM AON (**2**), lanes 1: snake venom PDE ladder. Lane 2: 5’-32P-labelled target RNA (**3**) without AON, Lanes 3-9: aliquots of the digest taken after 2, 3,4,5,6,20 and 90 min, respectively.(**J**) with 0.001 μM AON (**2**), lane 1: snake venom PDE ladder. Lane 2: 5’-32P-labelled target RNA (**3**) without AON, Lanes 3-9: aliquots of the digest taken after 2, 3,4,5,6,20 and 90 min, respectively.*Reaction conditions:* AON and RNA (0.01 μM) in buffer, containing 20 mM Tris-HCl (pH 8.0), 20 mM KCl, 10 mM MgCl2, 0.1 mM EDTA and 0.1 mM dithiothreitol (DTT), 21 ºC, 0.06 U of RNase H. Total reaction volume is 30 μl.

(**A**) (**B**) (**C**) (**D**)

9 8 7 6 5 4 3 2 1 9 8 7 6 5 4 3 2 1 9 8 7 6 5 4 3 2 1 9 8 7 6 5 4 3 2 1


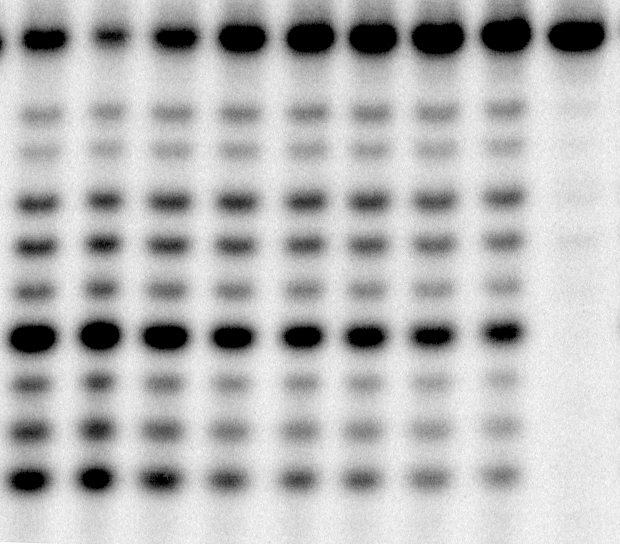

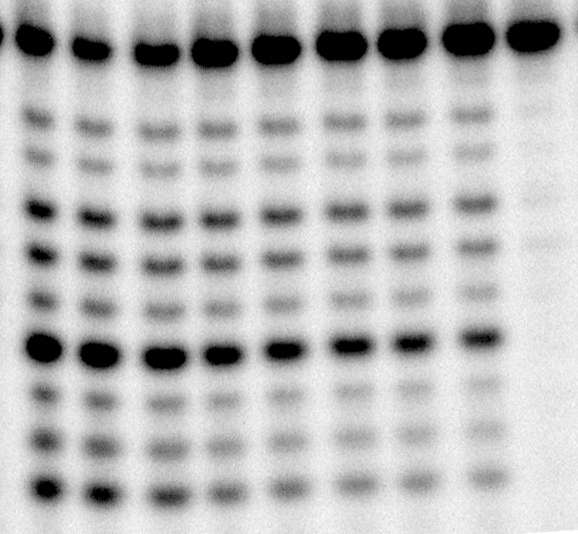

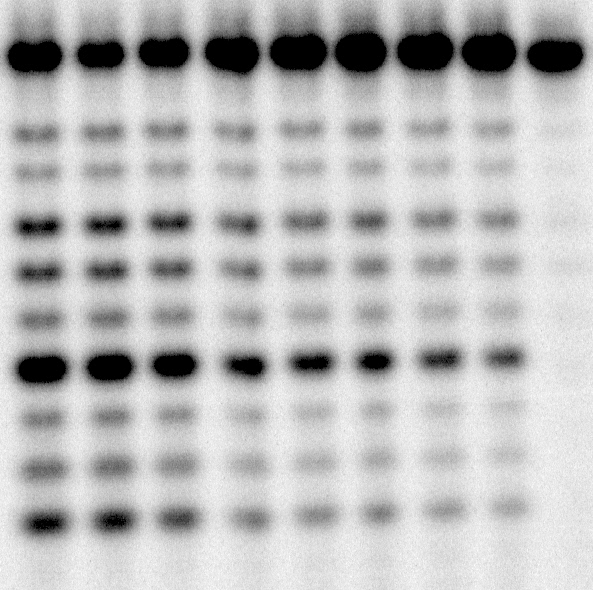

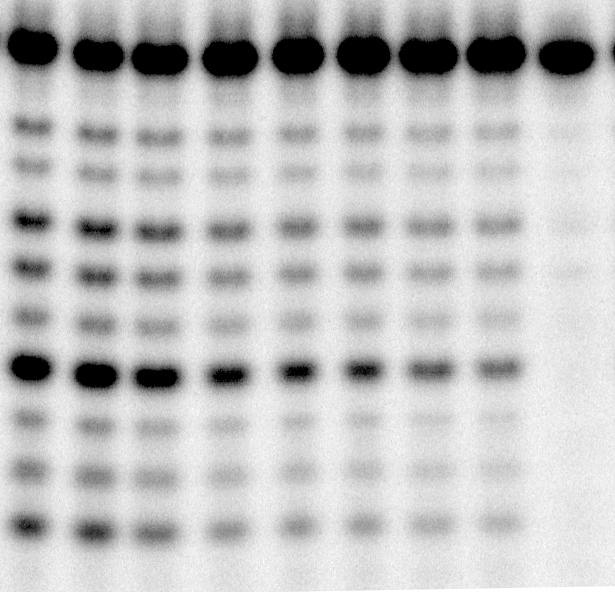


A8→

A5→

A13→

(**E**) (**F**) (**G**) (**H**)

9 8 7 6 5 4 3 2 1 9 8 7 6 5 4 3 2 1 9 8 7 6 5 4 3 2 1 9 8 7 6 5 4 3 2 1


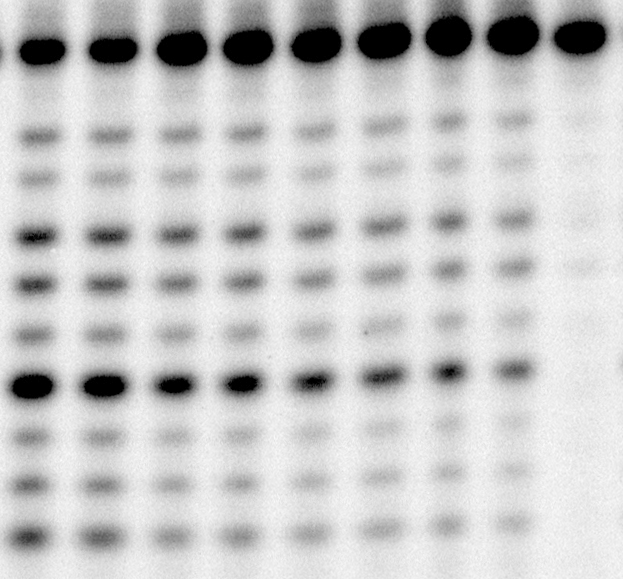

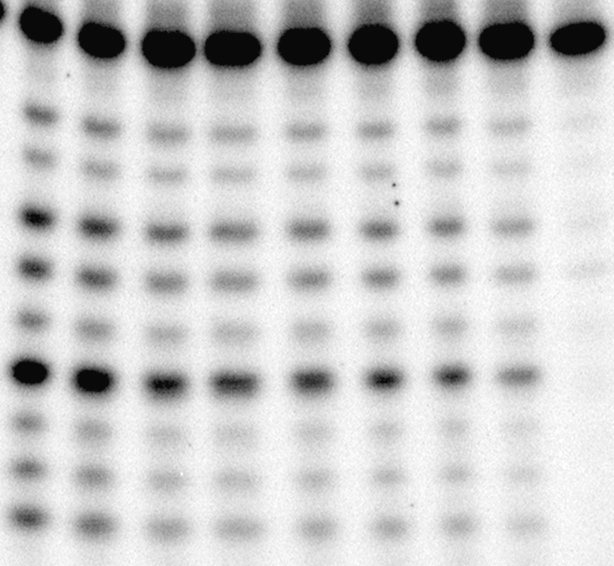

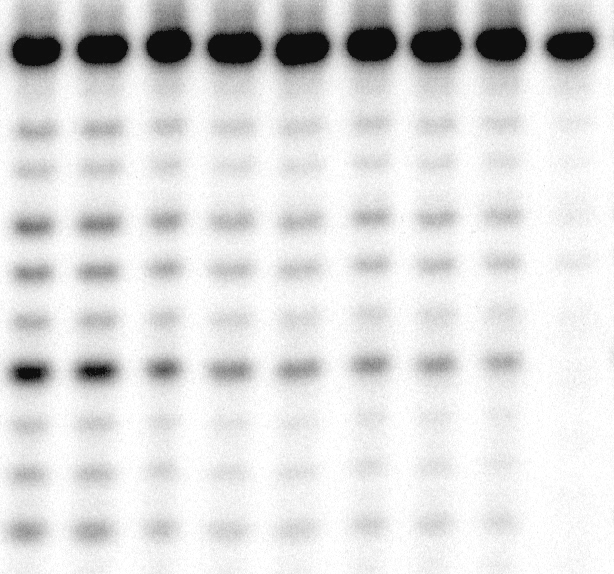

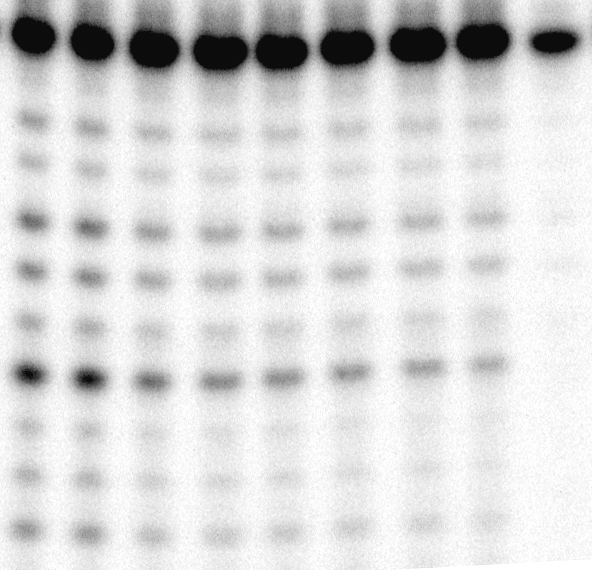


A13→

A8→

A5→

**Figure 2S.** Autoradiograms of the 20% denaturing PAGE, showing kinetics of the complementary 5’-32P-labelled target RNA (**3**) cleavage by RNase H as a function of the RNA concentration in the native 15mer AON (**1**) /RNA (**3**) hybrid duplex. (**A**) with 0.04 μM RNA (**3**), . Lane 1: 5’-32P-labelled target RNA (**3**) without AON; lanes 2-9: aliquots of the digest taken after 2, 3, 4, 5, 6, 20, 90 and 160 min, respectively. (**B**) with 0.06 μM RNA (**3**), . Lane 1: 5’-32P-labelled target RNA (**3**) without AON; lanes 2-9: aliquots of the digest taken after 2, 3, 4, 5, 6, 20, 90 and 160 min, respectively. (**C**) with 0.08 μM RNA (**3**), . Lane 1: 5’-32P-labelled target RNA (**3**) without AON; lanes 2-9: aliquots of the digest taken after 2, 3, 4, 5, 6, 20, 90 and 160 min, respectively. (**D**) with 0.1 μM RNA (**3)**. Lane 1: 5’-32P-labelled target RNA (**3**) without AON; lanes 2-9: aliquots of the digest taken after 2, 3, 4, 5, 6, 20, 90 and 160 min, respectively. (**E**) with 0.2 μM RNA (**3**), Lane 1: 5’-32P-labelled target RNA (**3**) without AON; lanes 2-9: aliquots of the digest taken after 2, 3, 4, 5, 6, 7, 20 and 90 min, respectively. (**F**) with 0.4 μM RNA (**3)** Lane 1: 5’-32P-labelled target RNA (**3**) without AON; lanes 2-9: aliquots of the digest taken after 2, 3, 4, 5, 6, 7, 20 and 90 min, respectively. (**G**) with 0.6 μM RNA (**3)**. Lane 1: 5’-32P-labelled target RNA (**3**) without AON; lanes 2-9: aliquots of the digest taken after 2, 3, 4, 5, 6, 7, 20 and 90 min, respectively. (**H**) with 1 μM RNA (**3**), Lane 1: 5’-32P-labelled target RNA (**3**) without AON; lanes 2-9: aliquots of the digest taken after 2, 3, 4, 5, 6, 7, 20 and 90 min, respectively. *Reaction conditions:* AON (**1**) (5 μM) and RNA (**3**) in buffer, containing 20 mM Tris-HCl (pH 8.0), 20 mM KCl, 10 mM MgCl2, 0.1 mM EDTA and 0.1 mM dithiothreitol (DTT), 21 ºC, 0.06 U of RNase H. Total reaction volume is 30 μl.

(**A**) (**B**) (**C**) (**D**)

9 8 7 6 5 4 3 2 1 9 8 7 6 5 4 3 2 1 9 8 7 6 5 4 3 2 1 9 8 7 6 5 4 3 2 1


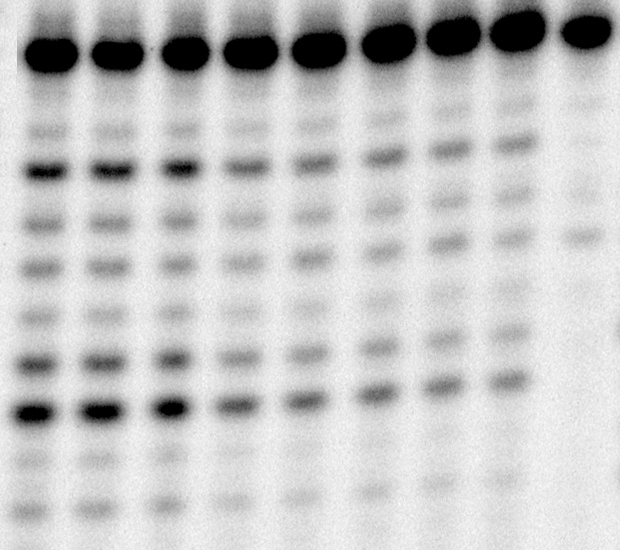

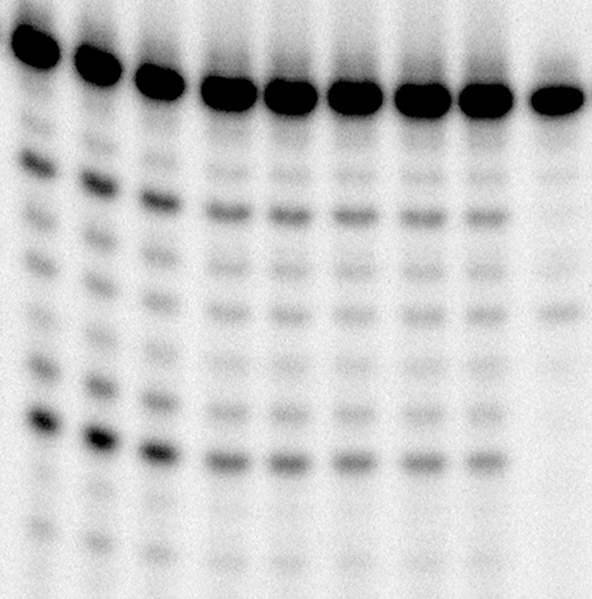

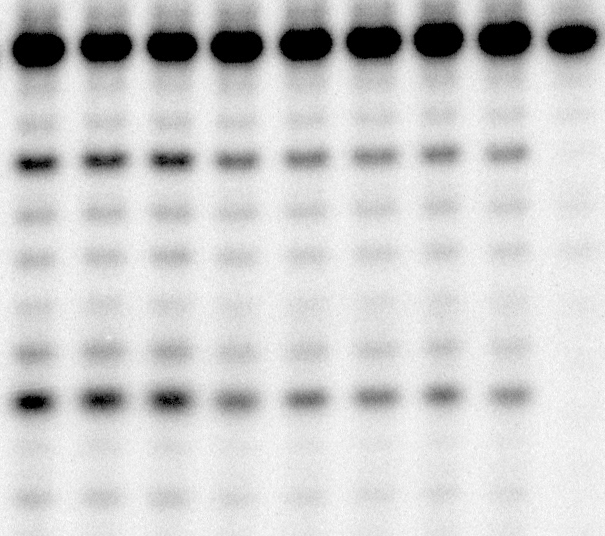

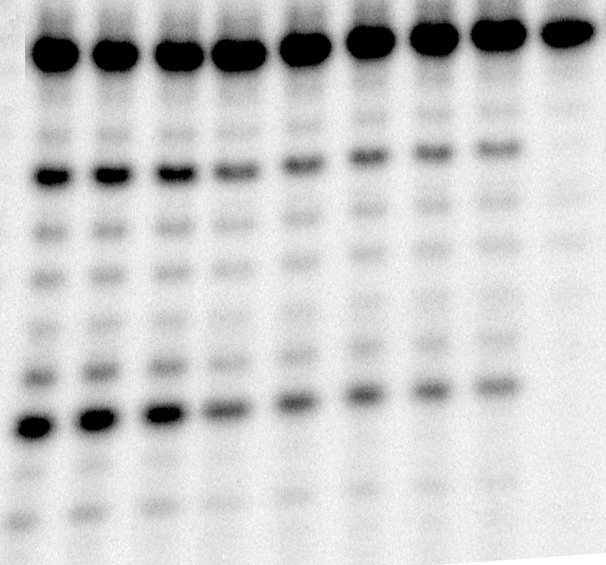


G12→

A7→

A8→

(**E**) (**F**) (**G**) (**H**)

9 8 7 6 5 4 3 2 1 9 8 7 6 5 4 3 2 1 9 8 7 6 5 4 3 2 1 9 8 7 6 5 4 3 2 1


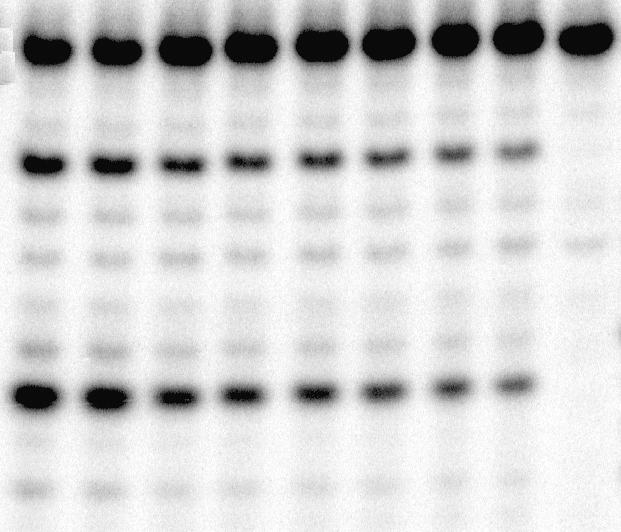

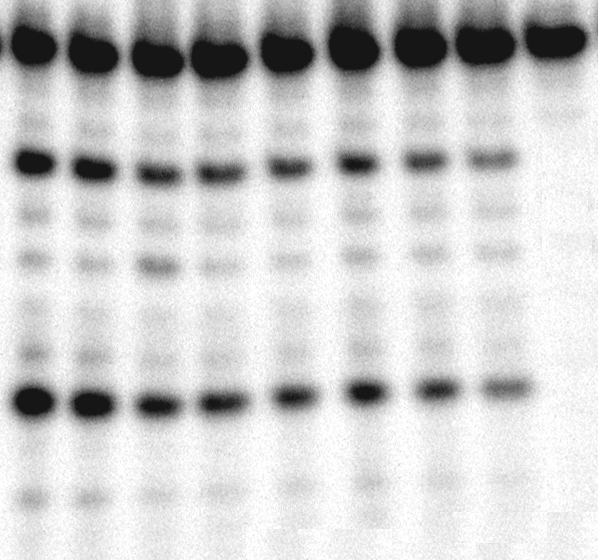

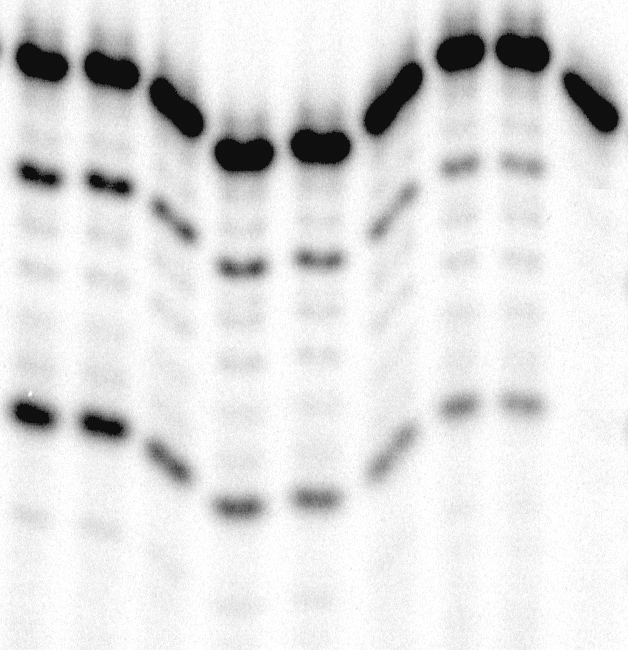

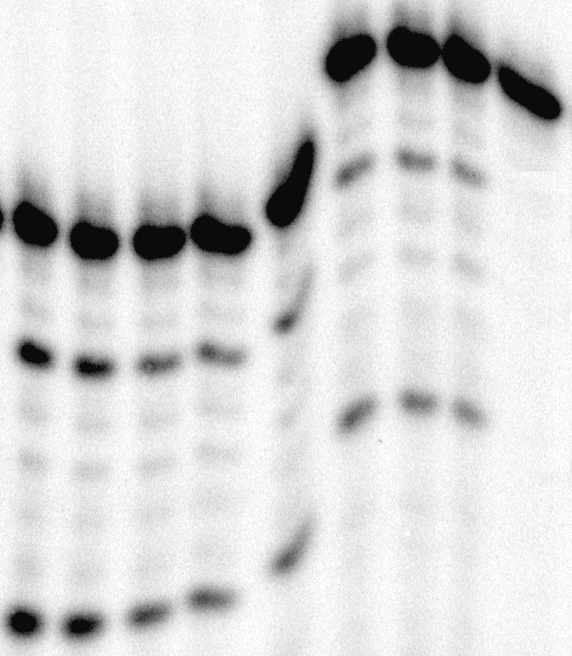


G12→

A7→

**Figure 3S.** Autoradiograms of the 20% denaturing PAGE, showing kinetics of the complementary 5’-32P-labelled target RNA (**3**) cleavage by RNase H as a function of the RNA concentration in the Oxetane-AON (**2**) /RNA (**3**) hybrid duplex. (**A**) with 0.04 μM RNA (**3**), . Lane 1: 5’-32P-labelled target RNA (**3**) without AON; lanes 2-9: aliquots of the digest taken after 2, 3, 4, 5, 6, 20, 90 and 160 min, respectively. (**B**) with 0.06 μM RNA (**3**), . Lane 1: 5’-32P-labelled target RNA (**3**) without AON; lanes 2-9: aliquots of the digest taken after 2, 3, 4, 5, 6, 20, 90 and 160 min, respectively. (**C**) with 0.08 μM RNA (**3**), . Lane 1: 5’-32P-labelled target RNA (**3**) without AON; lanes 2-9: aliquots of the digest taken after 2, 3, 4, 5, 6, 20, 90 and 160 min, respectively. (**D**) with 0.1 μM RNA (**3)**. Lane 1: 5’-32P-labelled target RNA (**3**) without AON; lanes 2-9: aliquots of the digest taken after 2, 3, 4, 5, 6, 20, 90 and 160 min, respectively. (**E**) with 0.2 μM RNA (**3**), Lane 1: 5’-32P-labelled target RNA (**3**) without AON; lanes 2-9: aliquots of the digest taken after 2, 3, 4, 5, 6, 7, 20 and 90 min, respectively. (**F**) with 0.4 μM RNA (**3)** Lane 1: 5’-32P-labelled target RNA (**3**) without AON; lanes 2-9: aliquots of the digest taken after 2, 3, 4, 5, 6, 7, 20 and 90 min, respectively. (**G**) with 0.6 μM RNA (**3)**. Lane 1: 5’-32P-labelled target RNA (**3**) without AON; lanes 2-9: aliquots of the digest taken after 2, 3, 4, 5, 6, 7, 20 and 90 min, respectively. (**H**) with 1 μM RNA (**3**), Lane 1: 5’-32P-labelled target RNA (**3**) without AON; lanes 2-9: aliquots of the digest taken after 2, 3, 4, 5, 6, 7, 20 and 90 min, respectively. *Reaction conditions:* AON (**2**) (5 μM) and RNA (**3**) in buffer, containing 20 mM Tris-HCl (pH 8.0), 20 mM KCl, 10 mM MgCl2, 0.1 mM EDTA and 0.1 mM dithiothreitol (DTT), 21 ºC, 0.06 U of RNase H. Total reaction volume is 30 μl.
